# Supplementary material for: Vision in the snapping shrimp Alpheus heterochaelis
Source: Oxford University Press journal article supplement (doi:10.1242/jeb.209015), 2019-01-01
Supplement: jeb209015supp.pdf [file jeb209015supp.pdf]

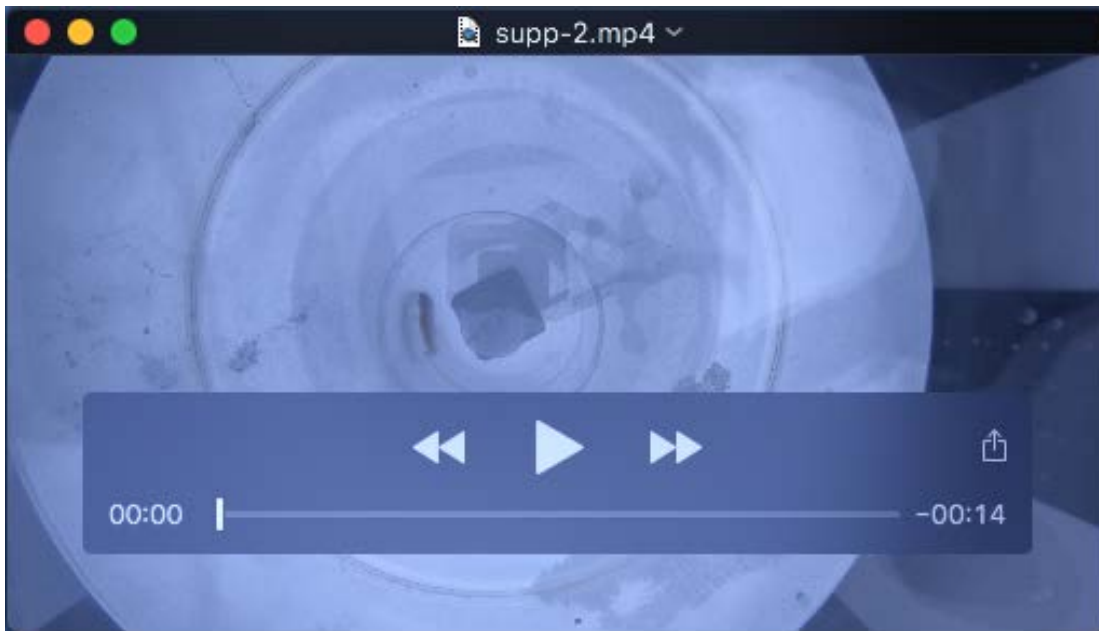

**Movie 1.** Behavioral evidence for spatial vision in snapping shrimp. In this representative movie, a snapping shrimp (*A. heterochaelis*) is seen following moving stripes with angular widths of  $20^\circ$ . When the stimulus changes direction, the shrimp also changes direction to follow the stimulus. This video is a subsample of the full-length video.
